# Supplementary material
Source: PubMed Central journal article supplement (PMC10991950)
Supplement: 262_2021_3014_MOESM1_ESM.pdf [file 262_2021_3014_MOESM1_ESM.pdf]

## SUPPLEMENTARY MATERIAL

### 1- MATERIAL AND METHODS

**Table S1. Reagents**

| Material                                                                                  | Supplier                      | Catalogue n°       | Remarks                                                                               |
|-------------------------------------------------------------------------------------------|-------------------------------|--------------------|---------------------------------------------------------------------------------------|
| Biocoll Separating Solution (isotonic solution)                                           | Merck Millipore               | Ref:L6115          | Cell isolation                                                                        |
| Bovine Serum Albumin FV                                                                   | Roche Diagnostics             | Ref:10735086001    | For cell culture                                                                      |
| Fetal Bovine Serum                                                                        | HyClone                       | Ref:SV30160.03     | For cell culture                                                                      |
| L-Glutamine                                                                               | Lonza                         | Ref:BE17-605E      | For cell culture                                                                      |
| RPMI medium 1640(1X)+GlutaMAX                                                             | Gibco/Life technologies       | Ref:72400-021      | For cell culture                                                                      |
| Mouse anti-human CD3-FITC (clone:SK7)                                                     | Becton-Dickinson              | Ref:345763         | FACS assays                                                                           |
| Mouse anti-human CD5-APC clone:L17F12)                                                    | Becton-Dickinson              | Ref:345783         | FACS assays                                                                           |
| Mouse anti-human CD19-APC-H7 (clone:SJ25C1)                                               | Becton-Dickinson              | Ref:641395         | FACS assays                                                                           |
| Mouse anti-Human CCR7-PE (clone:150503-IgG2A)                                             | R&D systems                   | Ref:FAB197P        | FACS assays                                                                           |
| Mouse anti-Human CD20-PE (clone:369444)                                                   | R&D systems                   | Ref:FAB4225P       | FACS assays                                                                           |
| Mouse IgG2a-PE                                                                            | Becton-Dickinson              | Ref:349053         | Irrelevant isotype control/FACS                                                       |
| BD Lysing solution                                                                        | Becton-Dickinson              | Ref:349202         | Irrelevant isotype control/FACS                                                       |
| Transwell Permeable Supports (6.5-mm diameter, 10-mm thickness, 5-mm diameter pore size). | Costar / Corning Incorporated | Ref:3421           | Cell migration assays /                                                               |
| Human CCL19                                                                               | Peptotech                     | Ref:300-29         | Cell migration                                                                        |
| Human CCL21                                                                               | Peptotech                     | Ref:300-35         | Cell migration                                                                        |
| Human IL-2                                                                                | StemCell Technologies         | Ref:78036.2        | NK cell activation                                                                    |
| Herceptin (trastuzumab)                                                                   | Roche Registration Ltd        | NDC: 50242-0134-68 | mAb targeting Her-2 not binding blood cells/ Used as an irrelevant human IgG1 in FACS |
| Mabthera (rituximab)                                                                      | Roche Registration Ltd        | 3281574E (E6)111   | mAb targeting CD20                                                                    |
| Imbruvica (ibrutinib)                                                                     | Janssen                       |                    | TKI targeting BTK Cys481                                                              |
| 7-AAD                                                                                     | Becton-Dickinson              | Ref:51-6898-1E     | FACS assays                                                                           |
| CellTrace Calcein Violet, AM                                                              | Invitrogen                    | Ref:C34858         | ADCC assays / Effector cells labeling                                                 |

Supplementary Figure 1

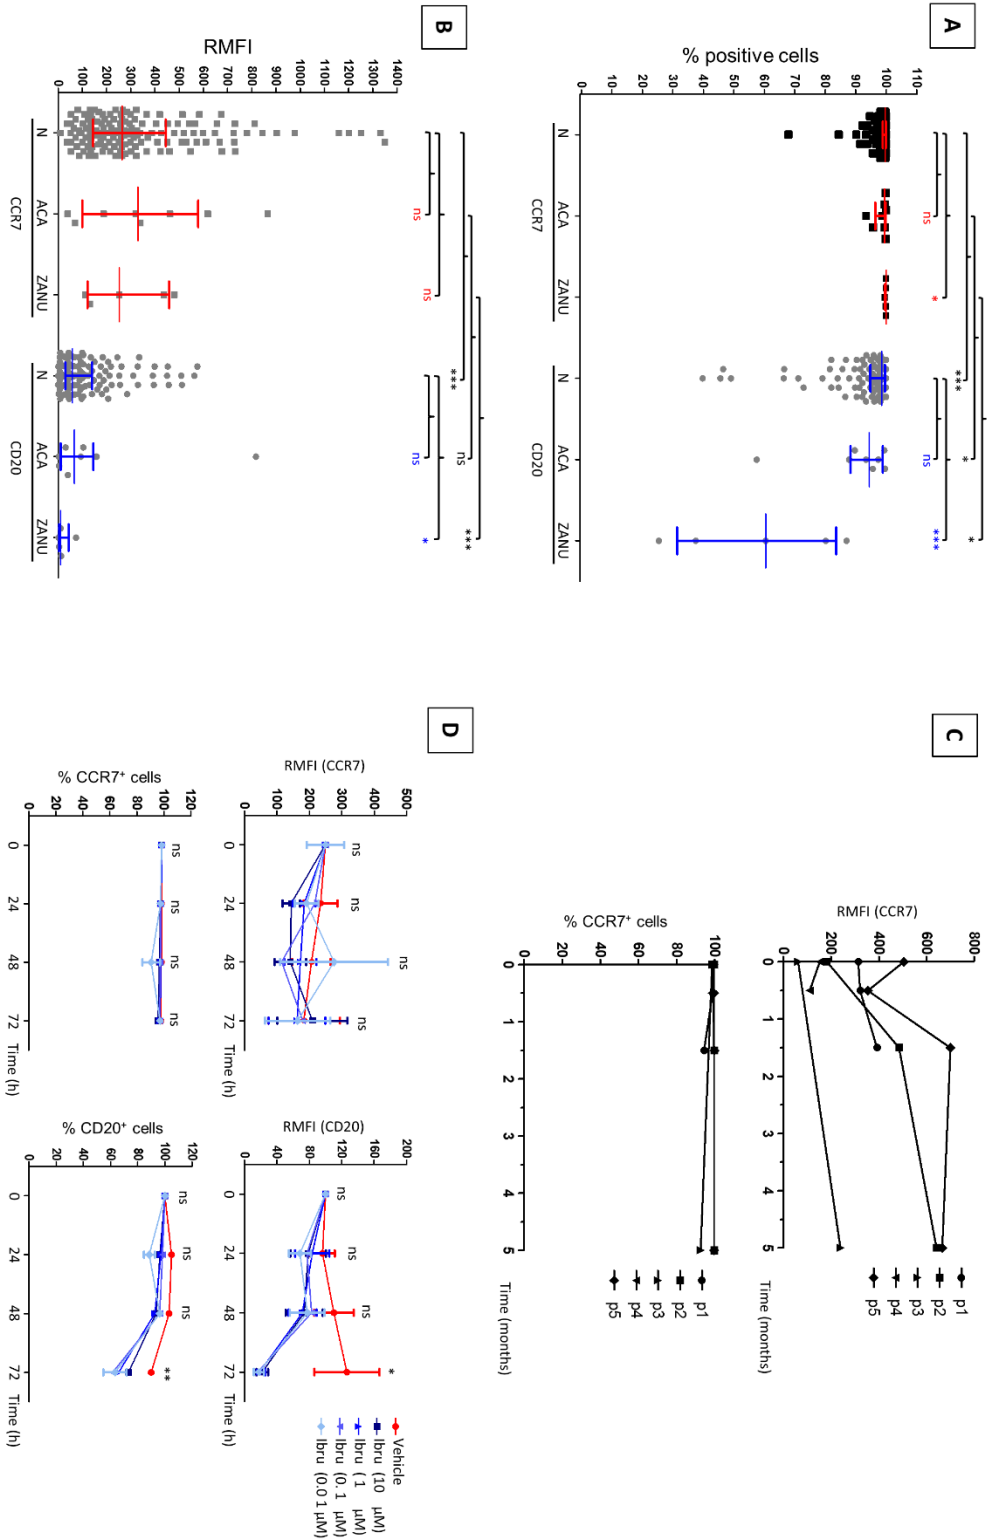

## 2- RESULTS

### **Supplementary Figure 1.**

**A-B) CCR7 expression in CLL cells remains high in patients treated with alternative BTK inhibitors.** Expression of surface CCR7 (or CD20) was analyzed in terms of proportion of malignant cells expressing the receptor (A) or of relative median fluorescence intensity (RMFI, relative to an irrelevant isotype control, arbitrary units) (B). Expression of CCR7 and CD20 was determined in CLL samples obtained from naïve patients (N, n=144) or receiving current treatment with acalabrutinib (ACA, n=8) or zanubrutinib (ZANU, n=5). In A and B, the graphs show the median  $\pm$  interquartile range. Man-Whitney-U was used to test statistical differences: ns, not significant; \*,  $p < 0.05$ ; \*\*,  $p < 0.01$ ; \*\*\*,  $p < 0.001$ .

**C) Ibrutinib discontinuation leads to re-expression of surface CCR7.** The graph shows a 5 months follow-up on surface CCR7 expression in five relapsed/refractory patients (p) who discontinued ibrutinib. For each patient, the expression of CCR7 (determined as RMFI or proportion of positive cells) is shown.

**D) CCR7 expression is maintained in CLL cells after *in vitro* incubation with ibrutinib.** CLL cells obtained from naïve patients (n=7) were incubated for 72 h in the presence of ibrutinib at different final concentrations [0 (vehicle, DMSO); 0.01; 0.1; 1; 10  $\mu$ M]. At time 0 and every 24 h CCR7 and CD20 surface expression was determined by flow cytometry and analyzed in terms of proportion of malignant cells expressing the receptor or of relative median intensity of fluorescence (RMIF, relative to an irrelevant isotype control, arbitrary units). In both cases, relative values to time 0 are shown. ns, not significant.

Supplementary Figure 2

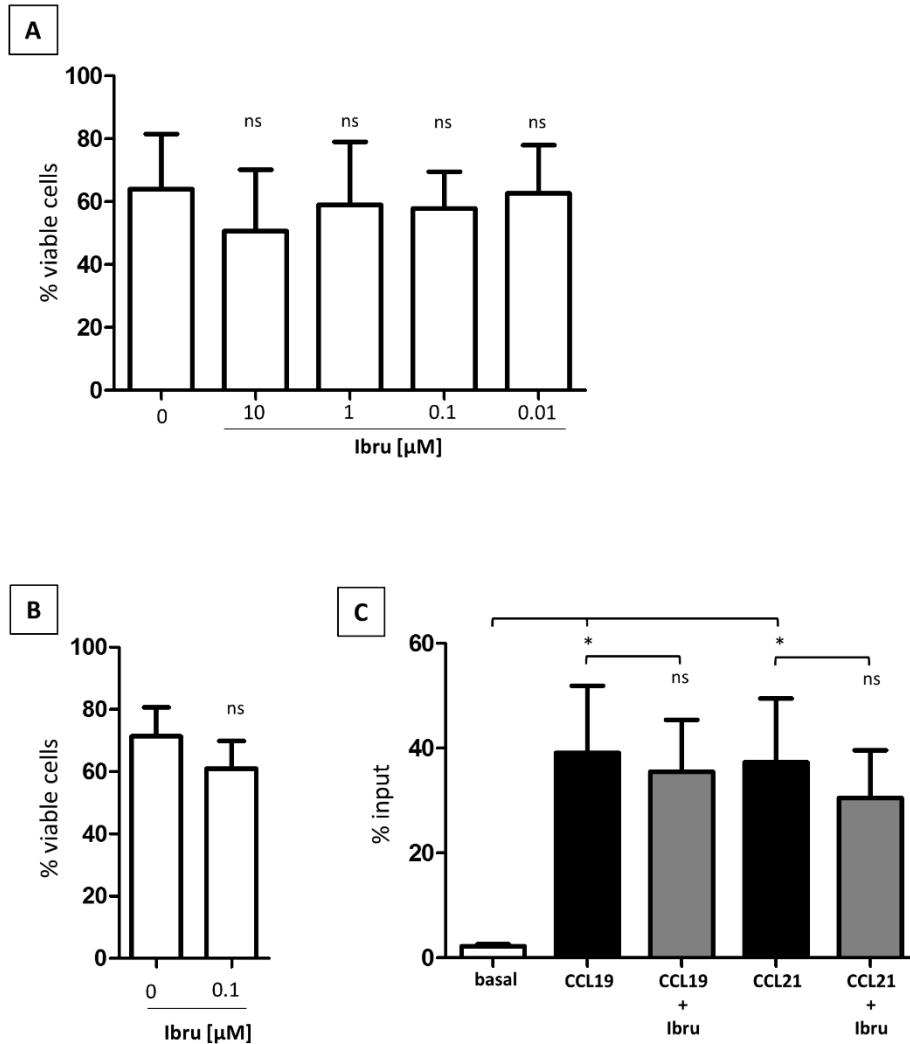

**Supplementary Figure 2.**

**A) Exposure to ibrutinib does not reduce CLL cell viability during the *in vitro* migration assays.**

The graph shows CLL cells viability after ibrutinib treatment *in vitro*. Freshly obtained primary CLL cells were isolated and seeded ( $5 \times 10^5$  cells/100 μl) in the upper chamber of transwell inserts. Then, cells were exposed to ibrutinib (range dose: 0/vehicle; 0.01; 0.1; 1; 10 μM) for 3 hours right before performing migration assays. Cells were also exposed to ibrutinib during the migration assay (4 hours). At the conclusion, the percentage of viable cells was determined by gating on 7-AAD-negative CLL cells. The graph shows the mean  $\pm$  SD for a total of 7 samples. Ns, not significant.

**B-C) Treatment (*in vitro*) with ibrutinib does not impair migration mediated by CCR7 in CLL cells.** To discard that the lack of ibrutinib inhibition could be associated to short incubation times we conducted migration assays where naïve CLL cells were incubated with or without ibrutinib at 0.1  $\mu$ M for 24 h before testing chemotaxis. After 24 hours, the proportion of viable CLL cells was measured in both groups by gating on 7-AAD-negative cells (B). In these settings ibrutinib induced a slight though not significant reduction in viability (mean  $\pm$  SD control vs 0.1  $\mu$ M ibrutinib:  $71.34 \pm 26.56$  vs  $63.29 \pm 24.82$ ;  $p= 0.5$ ). Again, no effect of ibrutinib was seen in CCR7-mediated migration of CLL cells towards CCL19 or CCL21 (C). The graph shows a comparative analysis of migration indices (% of input) in CLL cells obtained from naïve untreated patients (n=6) that were incubated for 24 h with ibrutinib at a final concentration of 0 (vehicle/DMSO) or 0.1  $\mu$ M prior to exposure to CCR7 ligands CCL19 or CCL21 (1  $\mu$ g/ml). Spontaneous migration, not mediated by a chemotactic stimulus, was considered as basal migration (in this point, no chemokine was added). As positive controls, cells without ibrutinib exposure were used (black bars). Bars represent mean  $\pm$  standard error of the mean (SEM). ns, not significant; \*,  $p<0.05$ .
